# Supplementary material for: Conducting polymers as bio-mimetic multistep macromolecular sensors of working conditions: polyindole/polyvinyl alcohol hybrid film senses electrical and chemical working ambient
Source: Royal Society of Chemistry journal article supplement (doi:10.1039/d2qm00322h), 2022-01-01
Supplement: d2qm00322h1.pdf [file d2qm00322h1.pdf]

**Supplementary Information**

**Conducting polymers as multistep macromolecular sensors of working condition: Evidence from polyindole**

Lijin Rajan, Madari Palliyalil Sidheekha, Aranhikundan Shabeeba, Yahya A. Ismail\*

*Department of Chemistry, University of Calicut, Thenhipalam, Kerala-673635, India*

**\*Correspondence**

Yahya A. Ismail

Department of Chemistry, University of Calicut, Thenhipalam, Kerala-673635, India

[aiyahya123@gmail.com](mailto:aiyahya123@gmail.com); [aiyahya@uoc.ac.in](mailto:aiyahya@uoc.ac.in)

## 1. FTIR-ATR spectra

The two peaks observed in Indole monomer at 746 and 721 $\text{cm}^{-1}$  due to the out-of-plane deformation of the C<sub>2</sub>-H and C<sub>3</sub>-H bonds respectively, were not present in the polymer. The aromatic ring stretching peaks appeared around 1611, 1425, 1210, and 1110  $\text{cm}^{-1}$ . The deformation of the benzene ring and the N-H vibration also indicates that the nitrogen and the benzene ring do not participate in the polymerization of Indole. It indicates that the polymerization has taken place at 2 and 3 positions.

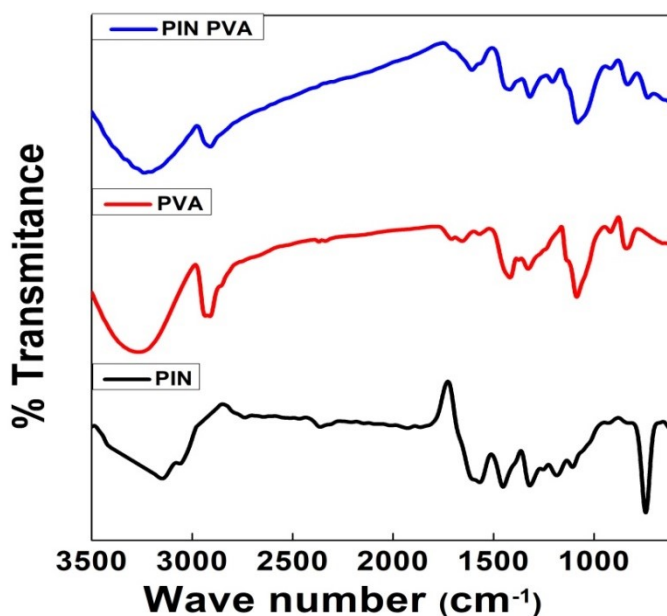

**Fig. S1.** FTIR spectrum of (a) PIN/PVA hybrid film. (b) Bare PVA film. (c) PIN powder

## 1. EDAX

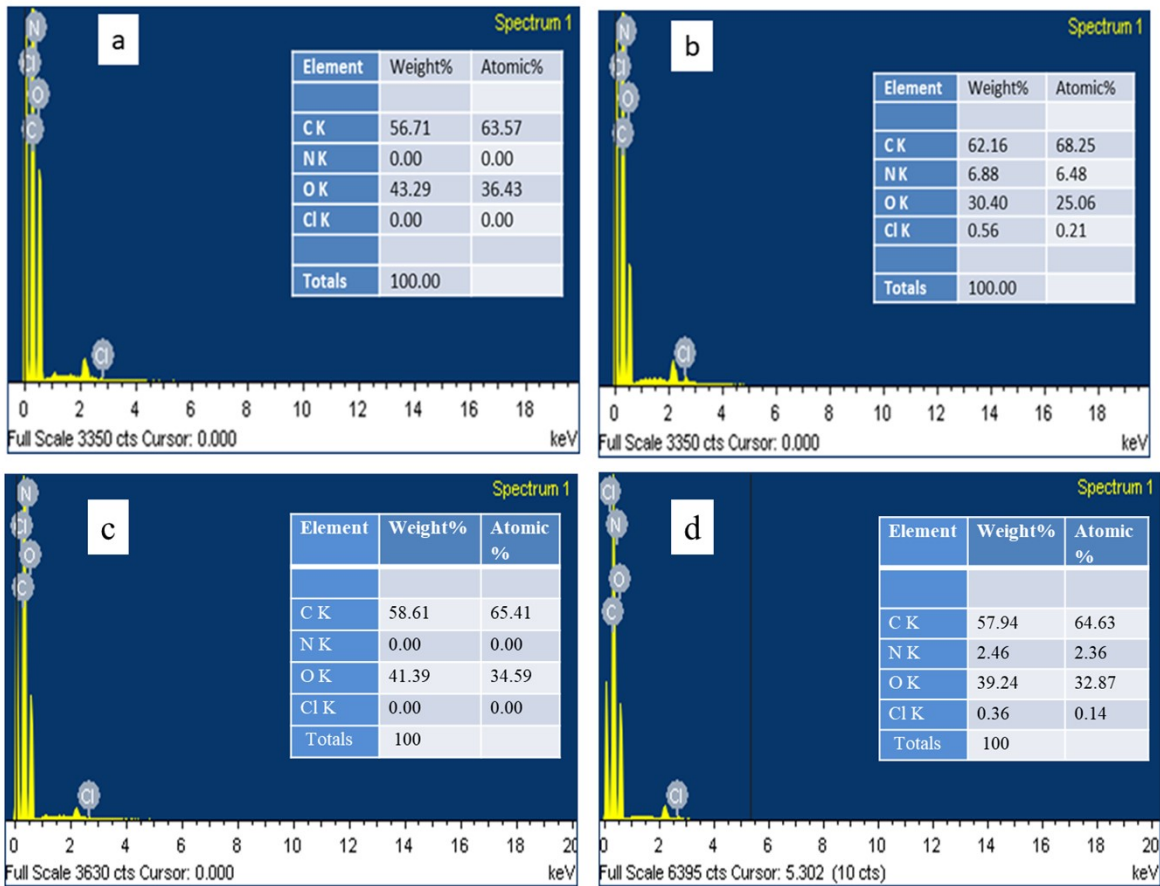

**Fig. S2.** EDAX data from (a) the surface of PVA film. (b) surface of PIN/PVA hybrid film. c) cross-section of the bare PVA film and d) cross-section of the PIN/PVA hybrid film

## 2. TGA

It can be observed from the figure that there is a three-step weight loss of PIN/PVA hybrid film. Initial weight loss appeared around 101°C is attributed to the removal of absorbed water molecule and surfactants. The second stage starting from 190°C to 305 °C represents the elimination of the low molecular weight oligomers and the dopant molecules, which is in between and finally, the polymer backbone degradation was observed from 405 °C to 576 °C. The degradation of bare PVA film followed a two-step process. The first stage of weight loss

from 70 °C to 135 °C and the second stage from 240 °C to 520 °C respectively represents the elimination of absorbed water molecule and the polymer backbone degradation.

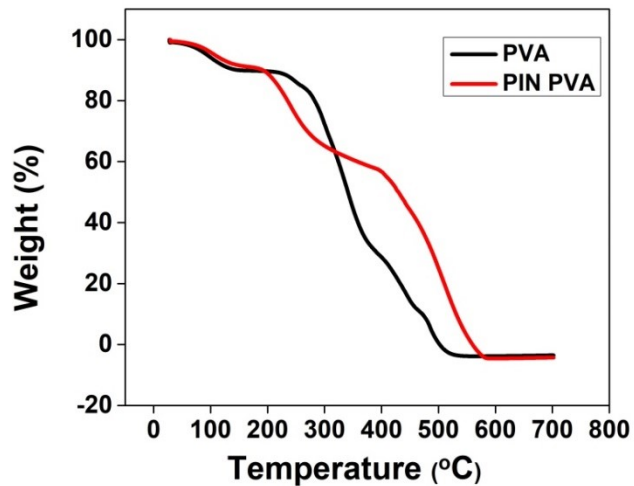

**Fig. S3.** TGA curve of bare PVA film and PIN/PVA hybrid film.

### 3. Conductivity

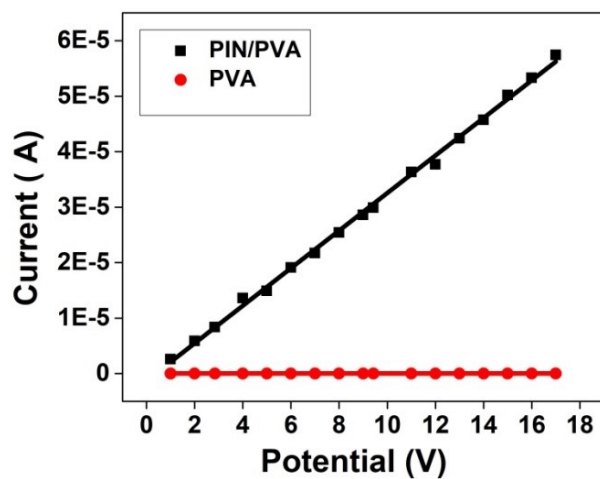

**Fig. S4.** I-V characteristic plot of bare PVA film and PIN/PVA hybrid film.

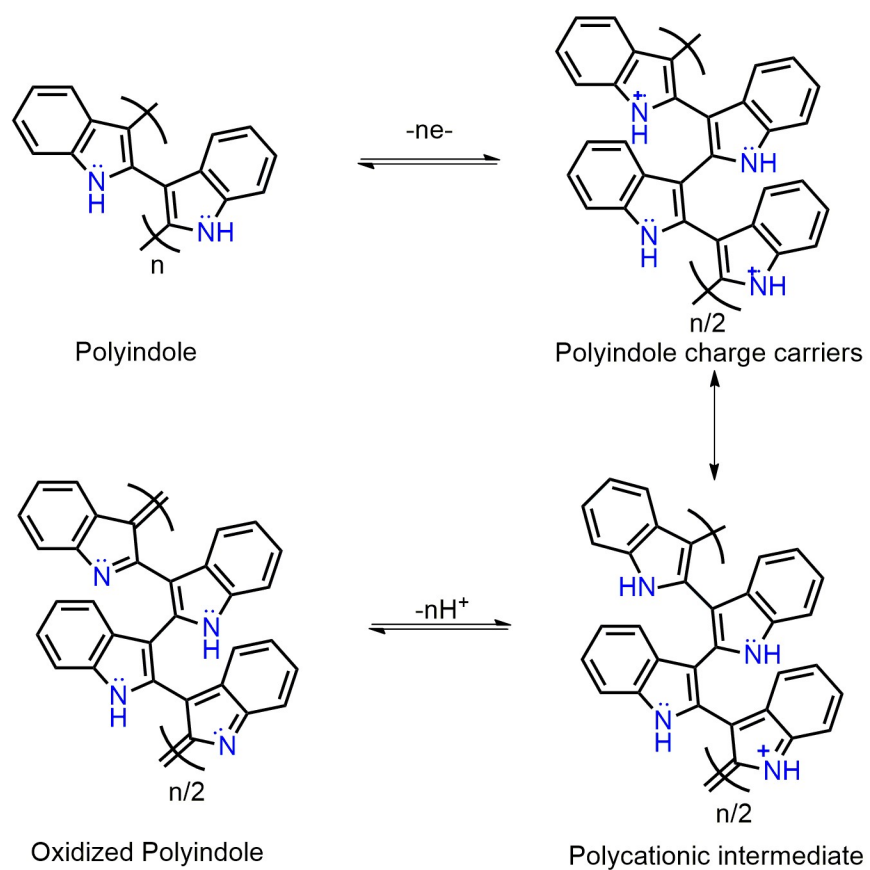

**Fig. S5.** Schematic representation of oxidation mechanism of polyindole.
